# Supplementary material for: Effect of a specific composition of short- and medium-chain fatty acid 1-Monoglycerides on growth performances and gut microbiota of gilthead sea bream (Sparus aurata)
Source: PeerJ. 2018 Jul 31;6:e5355. doi: 10.7717/peerj.5355 (PMC6074759; doi:10.7717/peerj.5355)
Supplement: Dataset S1 [file peerj-06-5355-s002.xlsx]

## Sheet: CTRL_feed
PAPER:	Effect of a specific composition of short- and medium- chain fatty acid 1-Monoglycerides on growth performances and gut microbiota of gilthead sea bream (Sparus aurata)
AUTHORS:	Simona Rimoldi, Emi Gliozheni, Chiara Ascione, Elisabetta Gini, Genciana Terova
CRITERIA:	List of identified taxa in the control feed.
Kingdom	Phylum	Class	Order	Family	Genus	Species	Nr. of sequences	Relative abundance [%]
Bacteria	Firmicutes	Bacilli	Lactobacillales	Lactobacillaceae	Lactobacillus	agilis	19	0.04
Bacteria	Firmicutes	Bacilli	Lactobacillales	Lactobacillaceae	Lactobacillus	zeae	1	0
Bacteria	Firmicutes	Bacilli	Lactobacillales	Lactobacillaceae	Lactobacillus	Unassigned	4122	8.63
Bacteria	Firmicutes	Bacilli	Lactobacillales	Lactobacillaceae	Lactobacillus	vaginalis	8	0.02
Bacteria	Firmicutes	Bacilli	Lactobacillales	Lactobacillaceae	Lactobacillus	pontis	3	0.01
Bacteria	Firmicutes	Bacilli	Lactobacillales	Lactobacillaceae	Lactobacillus	acidipiscis	1	0
Bacteria	Firmicutes	Bacilli	Lactobacillales	Lactobacillaceae	Lactobacillus	reuteri	8	0.02
Bacteria	Firmicutes	Bacilli	Lactobacillales	Lactobacillaceae	Pediococcus	acidilactici	5	0.01
Bacteria	Firmicutes	Bacilli	Lactobacillales	Streptococcaceae	Streptococcus	Unassigned	8	0.02
Bacteria	Firmicutes	Bacilli	Lactobacillales	Streptococcaceae	Streptococcus	luteciae	10	0.02
Bacteria	Firmicutes	Bacilli	Lactobacillales	Streptococcaceae	Streptococcus	sobrinus	1	0
Bacteria	Firmicutes	Bacilli	Lactobacillales	Streptococcaceae	Lactococcus	Unassigned	3	0.01
Bacteria	Firmicutes	Bacilli	Lactobacillales	Streptococcaceae	Lactococcus	garvieae	1	0
Bacteria	Firmicutes	Bacilli	Lactobacillales	Unassigned			4	0.01
Bacteria	Firmicutes	Bacilli	Lactobacillales	Enterococcaceae	Enterococcus	Unassigned	6	0.01
Bacteria	Firmicutes	Bacilli	Lactobacillales	Leuconostocaceae	Weissella	cibaria	3	0.01
Bacteria	Firmicutes	Bacilli	Lactobacillales	Leuconostocaceae	Unassigned		149	0.31
Bacteria	Firmicutes	Bacilli	Bacillales	Staphylococcaceae	Staphylococcus	sciuri	3	0.01
Bacteria	Firmicutes	Bacilli	Bacillales	Staphylococcaceae	Staphylococcus	Unassigned	37	0.08
Bacteria	Firmicutes	Bacilli	Bacillales	Staphylococcaceae	Jeotgalicoccus	Unassigned	5	0.01
Bacteria	Firmicutes	Bacilli	Bacillales	Bacillaceae	Virgibacillus	Unassigned	12	0.03
Bacteria	Firmicutes	Bacilli	Bacillales	Bacillaceae	Bacillus	thermoamylovorans	3	0.01
Bacteria	Firmicutes	Bacilli	Bacillales	Bacillaceae	Bacillus	coagulans	7	0.01
Bacteria	Firmicutes	Bacilli	Bacillales	Bacillaceae	Bacillus	Unassigned	14	0.03
Bacteria	Firmicutes	Bacilli	Bacillales	Bacillaceae	Oceanobacillus	caeni	5	0.01
Bacteria	Firmicutes	Bacilli	Bacillales	Bacillaceae	Geobacillus	Unassigned	23	0.05
Bacteria	Firmicutes	Bacilli	Bacillales	Bacillaceae	Unassigned		21	0.04
Bacteria	Firmicutes	Bacilli	Bacillales	Alicyclobacillaceae	Alicyclobacillus	Unassigned	4	0.01
Bacteria	Firmicutes	Bacilli	Bacillales	Planococcaceae	Ureibacillus	Unassigned	8	0.02
Bacteria	Firmicutes	Bacilli	Bacillales	Planococcaceae	Sporosarcina	Unassigned	4	0.01
Bacteria	Firmicutes	Bacilli	Bacillales	Planococcaceae	Sporosarcina	aquimarina	2	0
Bacteria	Firmicutes	Bacilli	Bacillales	Planococcaceae	Unassigned		10	0.02
Bacteria	Firmicutes	Bacilli	Bacillales	Paenibacillaceae	Paenibacillus	Unassigned	2	0
Bacteria	Firmicutes	Bacilli	Bacillales	Unassigned			23	0.05
Bacteria	Firmicutes	Clostridia	Thermoanaerobacterales	Unassigned			74	0.15
Bacteria	Firmicutes	Clostridia	Clostridiales	Clostridiaceae	Clostridium	perfringens	289	0.6
Bacteria	Firmicutes	Clostridia	Clostridiales	Clostridiaceae	Clostridium	Unassigned	255	0.53
Bacteria	Firmicutes	Clostridia	Clostridiales	Clostridiaceae	SMB53	Unassigned	63	0.13
Bacteria	Firmicutes	Clostridia	Clostridiales	Clostridiaceae	Sarcina	Unassigned	3	0.01
Bacteria	Firmicutes	Clostridia	Clostridiales	Clostridiaceae	Unassigned		5554	11.62
Bacteria	Firmicutes	Clostridia	Clostridiales	[Tissierellaceae]	Peptoniphilus	Unassigned	6	0.01
Bacteria	Firmicutes	Clostridia	Clostridiales	[Tissierellaceae]	Anaerococcus	Unassigned	1	0
Bacteria	Firmicutes	Clostridia	Clostridiales	[Tissierellaceae]	Tepidimicrobium	Unassigned	59	0.12
Bacteria	Firmicutes	Clostridia	Clostridiales	[Tissierellaceae]	Gallicola	Unassigned	1	0
Bacteria	Firmicutes	Clostridia	Clostridiales	[Tissierellaceae]	Sporanaerobacter	Unassigned	153	0.32
Bacteria	Firmicutes	Clostridia	Clostridiales	Peptostreptococcaceae	[Clostridium]	difficile	2	0
Bacteria	Firmicutes	Clostridia	Clostridiales	Peptostreptococcaceae	Unassigned		6	0.01
Bacteria	Firmicutes	Clostridia	Clostridiales	Peptostreptococcaceae	Peptostreptococcus	Unassigned	24	0.05
Bacteria	Firmicutes	Clostridia	Clostridiales	Peptostreptococcaceae	Peptostreptococcus	anaerobius	15	0.03
Bacteria	Firmicutes	Clostridia	Clostridiales	Veillonellaceae	Megasphaera	Unassigned	3	0.01
Bacteria	Bacteroidetes	Sphingobacteriia	Sphingobacteriales	Sphingobacteriaceae	Sphingobacterium	multivorum	1	0
Bacteria	Bacteroidetes	Sphingobacteriia	Sphingobacteriales	Sphingobacteriaceae	Unassigned		4	0.01
Bacteria	Bacteroidetes	Bacteroidia	Bacteroidales	Prevotellaceae	Prevotella	Unassigned	3	0.01
Bacteria	Proteobacteria	Alphaproteobacteria	Rickettsiales	mitochondria	Lupinus	luteus	22	0.05
Bacteria	Proteobacteria	Alphaproteobacteria	Rickettsiales	mitochondria	Spirodela	polyrhiza	107	0.22
Bacteria	Proteobacteria	Alphaproteobacteria	Rickettsiales	mitochondria	Zea	luxurians	97	0.2
Bacteria	Proteobacteria	Alphaproteobacteria	Rickettsiales	mitochondria	Gyrocarpus	americanus	2	0
Bacteria	Proteobacteria	Alphaproteobacteria	Rickettsiales	mitochondria	Hedyosmum	arborescens	23	0.05
Bacteria	Proteobacteria	Alphaproteobacteria	Rickettsiales	mitochondria	Oenothera	berteroana	7	0.01
Bacteria	Proteobacteria	Alphaproteobacteria	Rickettsiales	mitochondria	Unassigned		4	0.01
Bacteria	Proteobacteria	Alphaproteobacteria	Rickettsiales	mitochondria	Nelumbo	nucifera	2306	4.83
Bacteria	Proteobacteria	Alphaproteobacteria	Rickettsiales	mitochondria	Citrullus	lanatus	35	0.07
Bacteria	Proteobacteria	Alphaproteobacteria	Rickettsiales	mitochondria	Calycanthus	floridus	12	0.03
Bacteria	Proteobacteria	Alphaproteobacteria	Rickettsiales	mitochondria	Raphanus	sativus	1	0
Bacteria	Proteobacteria	Alphaproteobacteria	Rickettsiales	mitochondria	Didymeles	perrieri	3	0.01
Bacteria	Proteobacteria	Alphaproteobacteria	Rickettsiales	mitochondria	Victoria	amazonica	37	0.08
Bacteria	Proteobacteria	Alphaproteobacteria	Rickettsiales	mitochondria	Podophyllum	peltatum	3	0.01
Bacteria	Proteobacteria	Alphaproteobacteria	Rhodospirillales	Acetobacteraceae	Unassigned		1	0
Bacteria	Proteobacteria	Alphaproteobacteria	Rhodospirillales	Acetobacteraceae	Acetobacter	Unassigned	30	0.06
Bacteria	Proteobacteria	Alphaproteobacteria	Rhodospirillales	Acetobacteraceae	Gluconacetobacter	rhaeticus	17	0.04
Bacteria	Proteobacteria	Gammaproteobacteria	Enterobacteriales	Enterobacteriaceae	Unassigned		269	0.56
Bacteria	Proteobacteria	Gammaproteobacteria	Enterobacteriales	Enterobacteriaceae	Klebsiella	Unassigned	4	0.01
Bacteria	Proteobacteria	Gammaproteobacteria	Enterobacteriales	Enterobacteriaceae	Erwinia	Unassigned	31	0.06
Bacteria	Proteobacteria	Gammaproteobacteria	Enterobacteriales	Enterobacteriaceae	Erwinia	dispersa	3	0.01
Bacteria	Proteobacteria	Gammaproteobacteria	Vibrionales	Vibrionaceae	Photobacterium	angustum	3	0.01
Bacteria	Proteobacteria	Gammaproteobacteria	Vibrionales	Vibrionaceae	Photobacterium	damselae	585	1.22
Bacteria	Proteobacteria	Gammaproteobacteria	Vibrionales	Vibrionaceae	Photobacterium	Unassigned	34	0.07
Bacteria	Proteobacteria	Gammaproteobacteria	Vibrionales	Vibrionaceae	Vibrio	Unassigned	1	0
Bacteria	Proteobacteria	Gammaproteobacteria	Vibrionales	Pseudoalteromonadaceae	Unassigned		79	0.17
Bacteria	Proteobacteria	Gammaproteobacteria	Pseudomonadales	Moraxellaceae	Psychrobacter	Unassigned	3	0.01
Bacteria	Proteobacteria	Gammaproteobacteria	Xanthomonadales	Xanthomonadaceae	Stenotrophomonas	geniculata	6	0.01
Bacteria	Proteobacteria	Betaproteobacteria	Neisseriales	Neisseriaceae	Unassigned		4	0.01
Bacteria	Actinobacteria	Actinobacteria	Actinomycetales	Microbacteriaceae	Unassigned		3	0.01
Bacteria	Actinobacteria	Actinobacteria	Actinomycetales	Brevibacteriaceae	Brevibacterium	Unassigned	4	0.01
Bacteria	Actinobacteria	Actinobacteria	Actinomycetales	Propionibacteriaceae	Propionibacterium	acnes	10	0.02
Bacteria	Actinobacteria	Actinobacteria	Actinomycetales	Corynebacteriaceae	Corynebacterium	variabile	3	0.01
Bacteria	Actinobacteria	Actinobacteria	Bifidobacteriales	Bifidobacteriaceae	Bifidobacterium	Unassigned	2	0
Bacteria	Cyanobacteria	Chloroplast	Streptophyta	Unassigned			32604	68.22
Bacteria	Fusobacteria	Fusobacteriia	Fusobacteriales	Fusobacteriaceae	Cetobacterium	somerae	13	0.03
Bacteria	Fusobacteria	Fusobacteriia	Fusobacteriales	Fusobacteriaceae	Cetobacterium	Unassigned	282	0.59
Bacteria	Fusobacteria	Fusobacteriia	Fusobacteriales	Fusobacteriaceae	Fusobacterium	Unassigned	90	0.19

## Sheet: Sh108_feed
PAPER:	Effect of a specific composition of short- and medium- chain fatty acid 1-Monoglycerides on growth performances and gut microbiota of gilthead sea bream (Sparus aurata)
AUTHORS:	Simona Rimoldi, Emi Gliozheni, Chiara Ascione, Elisabetta Gini, Genciana Terova
CRITERIA:	List of identified taxa in the feed supplemented with SILOhealth108
Kingdom	Phylum	Class	Order	Family	Genus	Species	Nr. of sequences	Relative abundance [%]
Bacteria	Firmicutes	Bacilli	Lactobacillales	Lactobacillaceae	Lactobacillus	agilis	13	0.03
Bacteria	Firmicutes	Bacilli	Lactobacillales	Lactobacillaceae	Lactobacillus	zeae	4	0.01
Bacteria	Firmicutes	Bacilli	Lactobacillales	Lactobacillaceae	Lactobacillus	Unassigned	3144	7.07
Bacteria	Firmicutes	Bacilli	Lactobacillales	Lactobacillaceae	Lactobacillus	vaginalis	3	0.01
Bacteria	Firmicutes	Bacilli	Lactobacillales	Lactobacillaceae	Lactobacillus	pontis	6	0.01
Bacteria	Firmicutes	Bacilli	Lactobacillales	Lactobacillaceae	Lactobacillus	acidipiscis	1	0
Bacteria	Firmicutes	Bacilli	Lactobacillales	Lactobacillaceae	Lactobacillus	reuteri	10	0.02
Bacteria	Firmicutes	Bacilli	Lactobacillales	Lactobacillaceae	Pediococcus	Unassigned	1	0
Bacteria	Firmicutes	Bacilli	Lactobacillales	Lactobacillaceae	Pediococcus	acidilactici	3	0.01
Bacteria	Firmicutes	Bacilli	Lactobacillales	Streptococcaceae	Streptococcus	Unassigned	23	0.05
Bacteria	Firmicutes	Bacilli	Lactobacillales	Streptococcaceae	Streptococcus	luteciae	3	0.01
Bacteria	Firmicutes	Bacilli	Lactobacillales	Streptococcaceae	Streptococcus	sobrinus	1	0
Bacteria	Firmicutes	Bacilli	Lactobacillales	Streptococcaceae	Lactococcus	Unassigned	5	0.01
Bacteria	Firmicutes	Bacilli	Lactobacillales	Enterococcaceae	Enterococcus	Unassigned	6	0.01
Bacteria	Firmicutes	Bacilli	Lactobacillales	Leuconostocaceae	Weissella	cibaria	3	0.01
Bacteria	Firmicutes	Bacilli	Lactobacillales	Leuconostocaceae	Unassigned		122	0.27
Bacteria	Firmicutes	Bacilli	Bacillales	Staphylococcaceae	Staphylococcus	sciuri	4	0.01
Bacteria	Firmicutes	Bacilli	Bacillales	Staphylococcaceae	Staphylococcus	Unassigned	40	0.09
Bacteria	Firmicutes	Bacilli	Bacillales	Staphylococcaceae	Jeotgalicoccus	Unassigned	3	0.01
Bacteria	Firmicutes	Bacilli	Bacillales	Bacillaceae	Virgibacillus	Unassigned	14	0.03
Bacteria	Firmicutes	Bacilli	Bacillales	Bacillaceae	Bacillus	thermoamylovorans	5	0.01
Bacteria	Firmicutes	Bacilli	Bacillales	Bacillaceae	Bacillus	coagulans	5	0.01
Bacteria	Firmicutes	Bacilli	Bacillales	Bacillaceae	Bacillus	Unassigned	9	0.02
Bacteria	Firmicutes	Bacilli	Bacillales	Bacillaceae	Oceanobacillus	caeni	18	0.04
Bacteria	Firmicutes	Bacilli	Bacillales	Bacillaceae	Geobacillus	Unassigned	25	0.06
Bacteria	Firmicutes	Bacilli	Bacillales	Bacillaceae	Unassigned		9	0.02
Bacteria	Firmicutes	Bacilli	Bacillales	Alicyclobacillaceae	Alicyclobacillus	Unassigned	5	0.01
Bacteria	Firmicutes	Bacilli	Bacillales	Planococcaceae	Ureibacillus	Unassigned	6	0.01
Bacteria	Firmicutes	Bacilli	Bacillales	Planococcaceae	Sporosarcina	Unassigned	7	0.02
Bacteria	Firmicutes	Bacilli	Bacillales	Planococcaceae	Sporosarcina	aquimarina	1	0
Bacteria	Firmicutes	Bacilli	Bacillales	Planococcaceae	Unassigned		21	0.05
Bacteria	Firmicutes	Bacilli	Bacillales	Paenibacillaceae	Paenibacillus	Unassigned	1	0
Bacteria	Firmicutes	Bacilli	Bacillales	Unassigned			21	0.05
Bacteria	Firmicutes	Clostridia	Thermoanaerobacterales	Unassigned			90	0.2
Bacteria	Firmicutes	Clostridia	Clostridiales	Clostridiaceae	Clostridium	perfringens	336	0.76
Bacteria	Firmicutes	Clostridia	Clostridiales	Clostridiaceae	Clostridium	Unassigned	277	0.62
Bacteria	Firmicutes	Clostridia	Clostridiales	Clostridiaceae	SMB53	Unassigned	59	0.13
Bacteria	Firmicutes	Clostridia	Clostridiales	Clostridiaceae	Sarcina	Unassigned	1	0
Bacteria	Firmicutes	Clostridia	Clostridiales	Clostridiaceae	Unassigned		5809	13.06
Bacteria	Firmicutes	Clostridia	Clostridiales	[Tissierellaceae]	Peptoniphilus	Unassigned	9	0.02
Bacteria	Firmicutes	Clostridia	Clostridiales	[Tissierellaceae]	Anaerococcus	Unassigned	1	0
Bacteria	Firmicutes	Clostridia	Clostridiales	[Tissierellaceae]	Tepidimicrobium	Unassigned	56	0.13
Bacteria	Firmicutes	Clostridia	Clostridiales	[Tissierellaceae]	Gallicola	Unassigned	4	0.01
Bacteria	Firmicutes	Clostridia	Clostridiales	[Tissierellaceae]	Sporanaerobacter	Unassigned	185	0.42
Bacteria	Firmicutes	Clostridia	Clostridiales	Peptostreptococcaceae	[Clostridium]	difficile	4	0.01
Bacteria	Firmicutes	Clostridia	Clostridiales	Peptostreptococcaceae	Unassigned		14	0.03
Bacteria	Firmicutes	Clostridia	Clostridiales	Peptostreptococcaceae	Peptostreptococcus	Unassigned	25	0.06
Bacteria	Firmicutes	Clostridia	Clostridiales	Peptostreptococcaceae	Peptostreptococcus	anaerobius	17	0.04
Bacteria	Firmicutes	Clostridia	Clostridiales	Veillonellaceae	Megasphaera	Unassigned	3	0.01
Bacteria	Bacteroidetes	Sphingobacteriia	Sphingobacteriales	Sphingobacteriaceae	Sphingobacterium	multivorum	6	0.01
Bacteria	Bacteroidetes	Sphingobacteriia	Sphingobacteriales	Sphingobacteriaceae	Unassigned		7	0.02
Bacteria	Bacteroidetes	Bacteroidia	Bacteroidales	Prevotellaceae	Prevotella	Unassigned	8	0.02
Bacteria	Proteobacteria	Alphaproteobacteria	Rickettsiales	mitochondria	Lupinus	luteus	17	0.04
Bacteria	Proteobacteria	Alphaproteobacteria	Rickettsiales	mitochondria	Spirodela	polyrhiza	100	0.22
Bacteria	Proteobacteria	Alphaproteobacteria	Rickettsiales	mitochondria	Zea	luxurians	105	0.24
Bacteria	Proteobacteria	Alphaproteobacteria	Rickettsiales	mitochondria	Gyrocarpus	americanus	6	0.01
Bacteria	Proteobacteria	Alphaproteobacteria	Rickettsiales	mitochondria	Hedyosmum	arborescens	23	0.05
Bacteria	Proteobacteria	Alphaproteobacteria	Rickettsiales	mitochondria	Oenothera	berteroana	2	0
Bacteria	Proteobacteria	Alphaproteobacteria	Rickettsiales	mitochondria	Unassigned		1	0
Bacteria	Proteobacteria	Alphaproteobacteria	Rickettsiales	mitochondria	Nelumbo	nucifera	2304	5.18
Bacteria	Proteobacteria	Alphaproteobacteria	Rickettsiales	mitochondria	Citrullus	lanatus	31	0.07
Bacteria	Proteobacteria	Alphaproteobacteria	Rickettsiales	mitochondria	Calycanthus	floridus	20	0.04
Bacteria	Proteobacteria	Alphaproteobacteria	Rickettsiales	mitochondria	Didymeles	perrieri	2	0
Bacteria	Proteobacteria	Alphaproteobacteria	Rickettsiales	mitochondria	Victoria	amazonica	33	0.07
Bacteria	Proteobacteria	Alphaproteobacteria	Rickettsiales	mitochondria	Podophyllum	peltatum	3	0.01
Bacteria	Proteobacteria	Alphaproteobacteria	Rhodospirillales	Acetobacteraceae	Unassigned		5	0.01
Bacteria	Proteobacteria	Alphaproteobacteria	Rhodospirillales	Acetobacteraceae	Acetobacter	Unassigned	35	0.08
Bacteria	Proteobacteria	Alphaproteobacteria	Rhodospirillales	Acetobacteraceae	Gluconacetobacter	rhaeticus	14	0.03
Bacteria	Proteobacteria	Gammaproteobacteria	Enterobacteriales	Enterobacteriaceae	Unassigned		179	0.4
Bacteria	Proteobacteria	Gammaproteobacteria	Enterobacteriales	Enterobacteriaceae	Klebsiella	Unassigned	14	0.03
Bacteria	Proteobacteria	Gammaproteobacteria	Enterobacteriales	Enterobacteriaceae	Erwinia	Unassigned	48	0.11
Bacteria	Proteobacteria	Gammaproteobacteria	Enterobacteriales	Enterobacteriaceae	Erwinia	dispersa	2	0
Bacteria	Proteobacteria	Gammaproteobacteria	Vibrionales	Vibrionaceae	Photobacterium	angustum	5	0.01
Bacteria	Proteobacteria	Gammaproteobacteria	Vibrionales	Vibrionaceae	Photobacterium	damselae	599	1.35
Bacteria	Proteobacteria	Gammaproteobacteria	Vibrionales	Vibrionaceae	Photobacterium	Unassigned	34	0.08
Bacteria	Proteobacteria	Gammaproteobacteria	Vibrionales	Vibrionaceae	Vibrio	Unassigned	7	0.02
Bacteria	Proteobacteria	Gammaproteobacteria	Vibrionales	Pseudoalteromonadaceae	Unassigned		82	0.18
Bacteria	Proteobacteria	Gammaproteobacteria	Pseudomonadales	Moraxellaceae	Psychrobacter	Unassigned	3	0.01
Bacteria	Proteobacteria	Gammaproteobacteria	Xanthomonadales	Xanthomonadaceae	Stenotrophomonas	geniculata	4	0.01
Bacteria	Proteobacteria	Betaproteobacteria	Neisseriales	Neisseriaceae	Unassigned		4	0.01
Bacteria	Actinobacteria	Actinobacteria	Actinomycetales	Microbacteriaceae	Unassigned		5	0.01
Bacteria	Actinobacteria	Actinobacteria	Actinomycetales	Brevibacteriaceae	Brevibacterium	Unassigned	1	0
Bacteria	Actinobacteria	Actinobacteria	Actinomycetales	Propionibacteriaceae	Propionibacterium	acnes	18	0.04
Bacteria	Actinobacteria	Actinobacteria	Actinomycetales	Corynebacteriaceae	Corynebacterium	variabile	1	0
Bacteria	Cyanobacteria	Chloroplast	Streptophyta	Unassigned			29687	66.74
Bacteria	Fusobacteria	Fusobacteriia	Fusobacteriales	Fusobacteriaceae	Cetobacterium	somerae	25	0.06
Bacteria	Fusobacteria	Fusobacteriia	Fusobacteriales	Fusobacteriaceae	Cetobacterium	Unassigned	457	1.03
Bacteria	Fusobacteria	Fusobacteriia	Fusobacteriales	Fusobacteriaceae	Fusobacterium	Unassigned	154	0.35
