# Supplementary material for: Effect of a specific composition of short- and medium-chain fatty acid 1-Monoglycerides on growth performances and gut microbiota of gilthead sea bream (Sparus aurata)
Source: PubMed Central journal article supplement (PMC6074759; doi:10.7717/peerj.5355), 2018-07-31

**A**

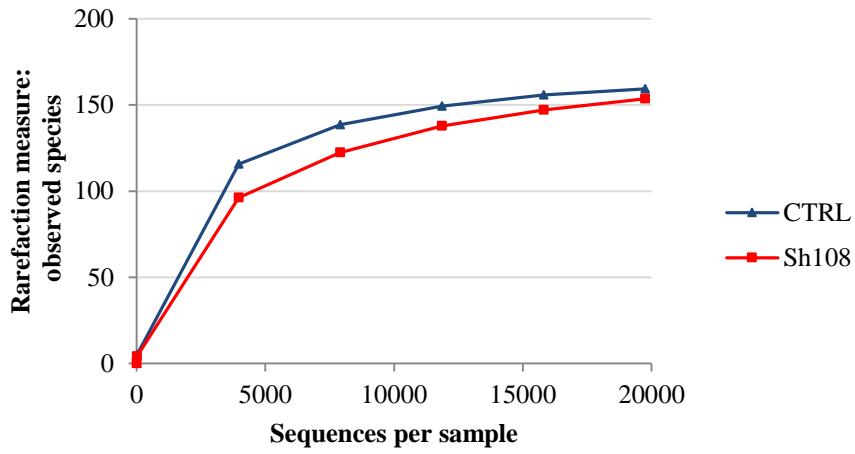

**B**

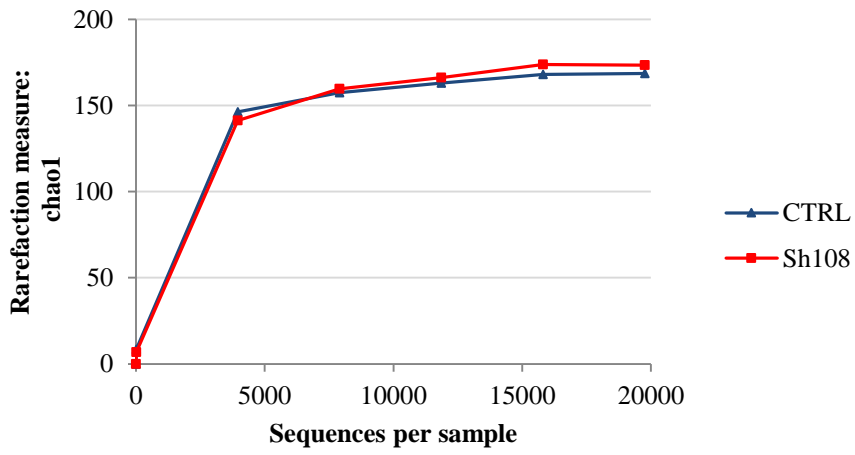

**C**

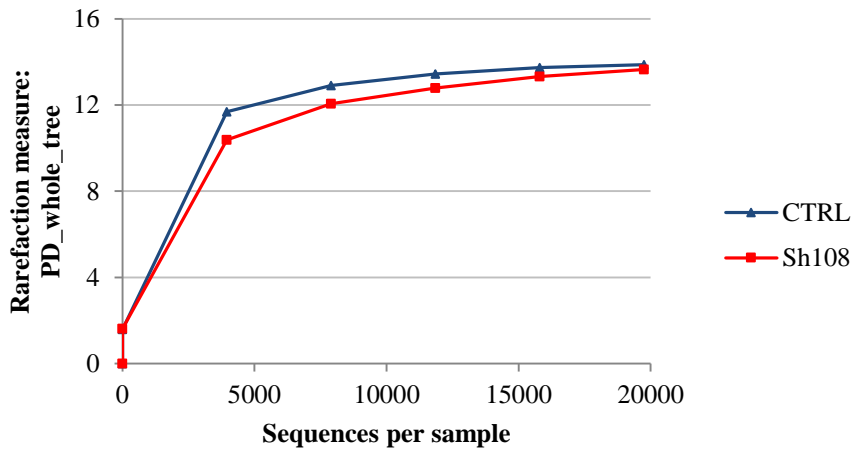

Supplement: peerj-06-5355-s001.pdf [file peerj-06-5355-s001.pdf]
